# Supplementary material for: Gel actuators based on polymeric radicals
Source: Royal Society of Chemistry journal article supplement (doi:10.1039/c9ra06364a), 2019-01-01
Supplement: c9ra06364a1.pdf [file c9ra06364a1.pdf]

*Electronic Supplementary Information*

**Gel Actuators based on Polymeric Radicals**

FTIR-spectrum after nucleophilic substitution with a nitroxide-containing amine

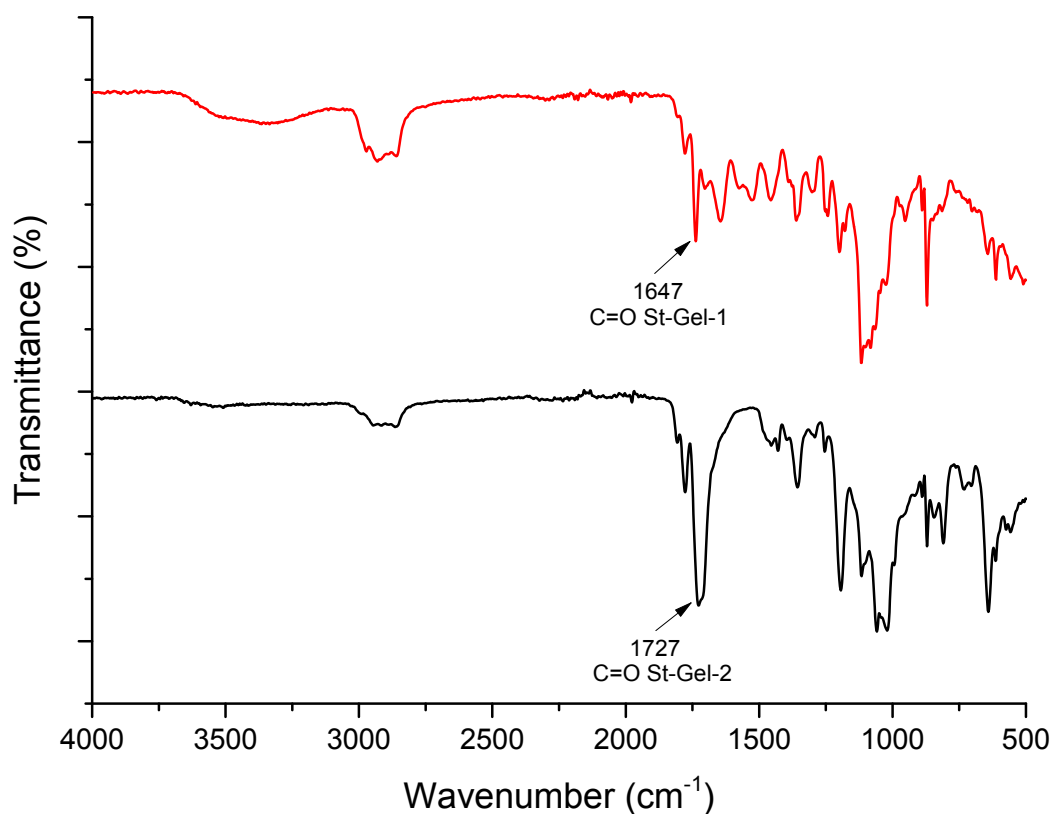

**Figure. S1** FTIR spectra of prepared gels, gel **G1** (top), gel **G2** (bottom) showing substitution by amino-radical.

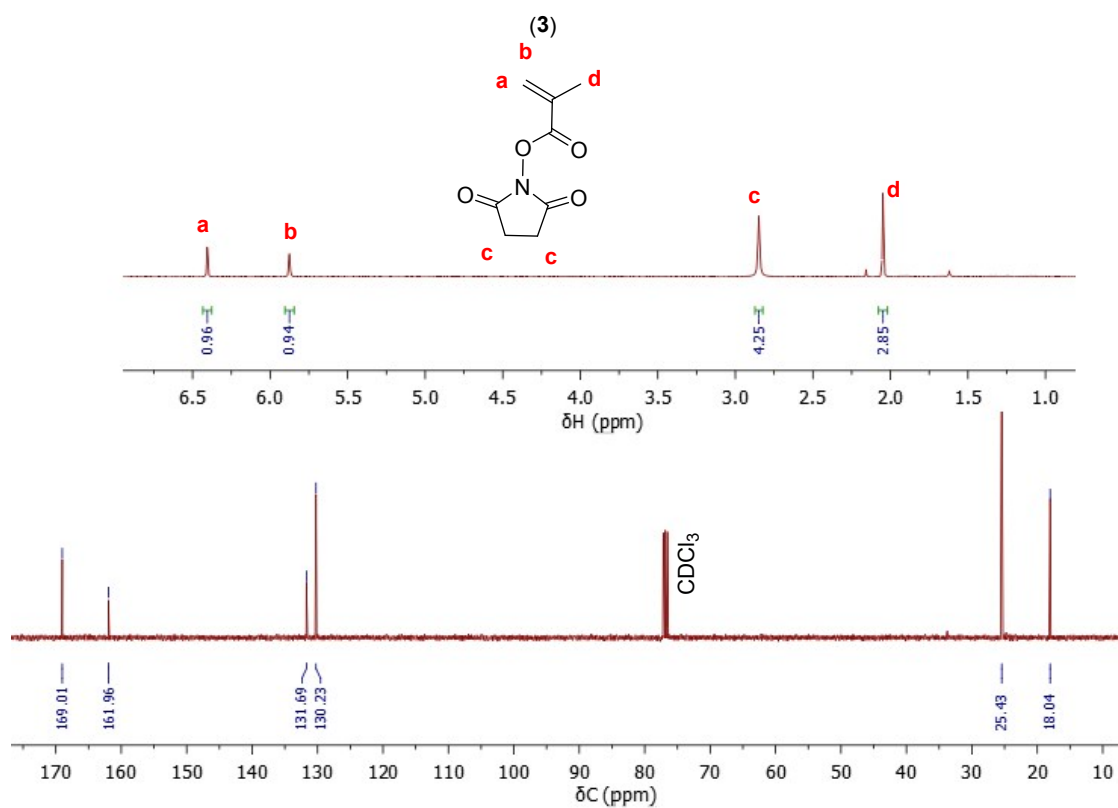

**Figure. S2** NMR spectra of monomer **1**,  $^1\text{H}$  NMR spectrum (top) and  $^{13}\text{C}$  NMR spectrum (bottom) in  $\text{CDCl}_3$ .

Table S1, Resulting compositions of gels with (**G2-C**), and without carbon fillers (**G2**)

| Gel         | Monomer 1 /mg | DMF/ mg | MWCNT /mg | FLG/ mg | Cross-linker /mg | ABCN/mg |
|-------------|---------------|---------|-----------|---------|------------------|---------|
| <b>G2</b>   | 400           | 1400    | -         | -       | 30               | 20      |
| <b>G2-C</b> | 400           | 1381    | 14.6      | 4.4     | 30               | 20      |
